# Supplementary material
Source: Elsevier journal article supplement (https://www.sciencedirect.com/science/article/pii/S0870255120304601)
Supplement: mmc1 [file S0870255120304601:mmc1.doc]

## **Tabela Suplementar S1: Códigos ICD considerados na identificação dos episódios de internamento.**

| **Descrição** |  | **Designação** |
| --- | --- | --- |
| **DCI** | **ICD-9-CM** |  |
| 410 | Enfarte agudo do miocárdio |
| 411 | Outras formas agudas e subagudas de doença cardíaca isquémica |
| 412 | Enfarte agudo do miocárdio antigo |
| 413 | Angina pectoris |
| 414 | Outras formas crónicas de doença cardíaca isquémica |
| **ICD-10-CM** |  |
| I20 | Angina pectoris |
| I21 | Enfarte agudo do miocárdio com e sem elevação do segmento ST |
| I22 | Episódio subsequente de enfarte agudo do miocárdio com e sem elevação do segmento ST |
| I23 | Complicações após enfarte agudo do miocárdio com e sem elevação do segmento ST (no período de 28 dias) |
| I24 | Outras doenças isquémicas cardíacas agudas |
| I25 | Doença isquémica cardíaca crónica |
| **DCVI** | **ICD-9-CM** |  |
| 433 | Oclusão e estenose das artérias pré-cerebrais |
| 434 | Oclusão das artérias cerebrais |
| 435 | Isquémica cerebral transitória |
| 436 | Doença cerebrovascular aguda mas mal-definida |
| 437.0 | Aterosclerose cerebral |
| 437.1 | Outra doença cerebrovascular generalizada |
| **ICD-10-CM** |  |
| I63 | Enfarte cerebral |
| I65 | Oclusão e estenose das artérias pré-cerebrais, sem enfarte cerebral |
| I66 | Oclusão e estenose das artérias cerebrais, sem enfarte cerebral |
| G45 | Acidente isquémico transitório e síndromes relacionadas |
| I67.2 | Aterosclerose cerebral |
| I67.81 | Insuficiência cerebrovascular aguda |
| I67.82 | Isquémica cerebral |
| I69.3 | Sequelas de enfarte cerebral |
| **DAP** | **ICD-9-CM** |  |
| 440.0 | Aterosclerose da aorta |
| 440.2x | Aterosclerose de artérias nativas das extremidades |
| 440.3x | Aterosclerose de enxerto de revascularização das extremidades |
| 440.4 | Oclusão crónica total de artéria das extremidades |
| 440.8 | Aterosclerose de outras artérias especificadas |
| 440.9 | Aterosclerose generalizada e não especificada |
| 443.89 | Outras doenças vasculares periféricas especificadas |
| 443.9 | Doença vascular periférica, não especificada |
| 249.7 | Diabetes mellitus secundária com perturbações circulatórias periféricas |
| 250.7 | Diabetes com perturbações circulatórias periféricas |
| 444.22 | Embolia e trombose arterial de artérias das extremidades, extremidade inferior |
| 444.81 | Embolia e trombose arterial de outras artérias especificadas, artéria ilíaca |
| 785.4 | Gangrena |
| 443.1 | Doença de Buerger |
| 443.81 | Angiopatia periférica em doenças classificadas noutra parte |
| **ICD-10-CM** |  |
| I70.0 | Aterosclerose da aorta |
| I70.2 | Aterosclerose das artérias nativas das extremidades |
| I70.3 | Aterosclerose de enxerto de revascularização das extremidades do tipo não especificado |
| I70.4 | Aterosclerose de enxerto de revascularização das extremidades do tipo venoso autólogo |
| I70.5 | Aterosclerose de enxerto(s) de revascularização das extremidades do tipo biológico não-autólogo |
| I70.6 | Aterosclerose de enxerto(s) de revascularização das extremidades do tipo não-biológico |
| I70.7 | Aterosclerose de outro tipo de enxerto(s) de revascularização das extremidades |
| I70.8 | Aterosclerose de outras artérias |
| I70.9 | Aterosclerose, outra e não especificada |
| I73.89 | Outras doenças vasculares periféricas especificadas |
| I73.9 | Doença vascular periférica, não especificada |
| E08.5 | Diabetes mellitus devido a doença subjacente com complicações circulatórias |
| E09.5 | Diabetes induzida por fármacos ou químicos com complicações circulatórias |
| E11.5 | Diabetes mellitus tipo 2 com complicações circulatórias |
| E10.5 | Diabetes mellitus tipo 1 com complicações circulatórias |
| I74.3 | Embolia e trombose das artérias das extremidades inferiores |
| I74.5 | Embolia e trombose da artéria ilíaca |
| I75.02 | Ateroembolia da extremidade inferior |
| I96 | Gangrena, não classificada noutra parte |
| I73.1 | Tromboangeíte obliterante (Doença de Buerger) |
| I79.8 | Outras perturbações das artérias, arteríolas e capilares em perturbações classificadas noutra parte |

## **Tabela Suplementar S2: Critérios de seleção aplicados à base de dados SIARS para identificação da subpopulação de interesse.**

| Foram incluídos todos os utentes que tinham, **cumulativamente**:   - idade igual ou superior a 18 anos; - registo de pelo menos uma consulta no SIARS realizada na ARS LVT no período entre 1 de janeiro de 2016 e 31 de dezembro de 2016; - cumprindo, **pelo menos uma,** das seguintes condições: - Registo do diagnóstico de doença arterial coronária ou doença cerebrovascular ou doença arterial periférica pela presença dos códigos ICPC21 «K74» ou «K75» ou «K76» ou «K89» ou «K90» ou «K92» em qualquer campo da base de dados (critério “manifestações”) - Dispensa de um medicamento antiagregante plaquetário identificado pelo código da classificação *Anatomical Therapeutic Chemical* (ATC) B01AC ou naftidrofurilo (ATC C04AX21) ou pentoxifilina (ATC C04AD03) (critério “medicamentos”) - Registo de **pelo menos três** dos seguintes fatores de risco cardiovascular (baseados no estudo REACH[[1]](#footnote-2)):   - Idade ≥65 anos nos homens ou ≥70 anos nas mulheres   - Hábitos tabágicos pela presença do código ICPC2 «P17» ou registo do número de cigarros consumidos por dia   - Tensão arterial sistólica ≥ 150 mmHg   - Dispensa de pelo menos um medicamento antidiabético identificado pelos códigos ATC A10   - Microalbuminúria ≥ 30 ug/mL   - Dispensa de medicamentos modificadores dos lípidos pelo código ATC C10 |
| --- |

## **Tabela Suplementar S3: Custos unitários de consultas e episódios de urgência sem internamento.**

| **Consultas** | **Custo Unitário (€)** | **Descrição e Fontes** |
| --- | --- | --- |
| Consulta no Centro de Saúde | 31,00 | Portaria n.º 254/2018, de 7 de setembro |
| Consulta Hospitalar de Especialidade |
| Consulta de Medicina Física e Reabilitação |
| Consulta de enfermagem | 16,00 | Portaria n.º 254/2018, de 7 de setembro |
| Consulta de Urgência | 97,56 | Portaria n.º 254/2018, de 7 de setembro1 |

1Ponderado pela distribuição do número de episódios de urgência (médico-cirúrgica e polivalente), de acordo com o "Relatório anual sobre o acesso a cuidados de saúde nos estabelecimentos do SNS e entidades convencionadas (2014)" (p. 89). Ministério da Saúde, setembro 2017.

## **Tabela Suplementar S4: Custos unitários de MCDT.**

| **MCDT** | **Custo Unitário (€)** | **Descrição (Fonte: Portaria n.º 254/2018)** |
| --- | --- | --- |
| Hemograma com fórmula leucocitária , s | 4,70 € | GDH: 24209 |
| Glucose, doseamento, s/u/l | 1,10 € | GDH: 22076 |
| Hemoglobina A1c (glicada) | 7,30 € | GDH: 22151 |
| Creatinina, s/u | 1,20 € | GDH: 21620 |
| Ureia, s/u | 1,30 € | GDH: 22949 |
| Ionograma (Na, K, Cl), s/u | 1,50 € | GDH: 22271 |
| Aminotransferase da alanina (ALT), s | 1,30 € | GDH: 21217 |
| Aminotransferase do aspartato (AST), s | 1,30 € | GDH: 21220 |
| Colesterol total, s/l | 1,30 € | GDH: 21554 |
| Colesterol da fracção HDL, s | 1,90 € | GDH: 21539 |
| Colesterol da fracção LDL, s | 2,40 € | GDH: 21545 |
| Triglicéridos, s/u/l | 1,70 € | GDH: 22920 |
| Lipoproteína (a), s | 8,80 € | GDH: 21272 |
| Peptídeo natriurético (tipo B), s | 29,60 € | GDH: 22578 |
| Creatinaquinase (CK), s | 1,70 € | GDH: 21609 |
| Albumina, u (ocasional) | 4,50 € | GDH: 21141 |
| Tempo de tromboplastina parcial activado (APTT), s | 3,00 € | GDH: 24359 |
| Tempo protrombina (TP, Quick, INR) | 2,90 € | GDH: 24347 |
| Urina, análise sumária (incluí análise do sedimento) | 3,67 € | GDH: 22954 |
| ECG simples de 12 derivações | 6,50 € | GDH:40301 |
| Registo de Holter até 24 horas com análise interactiva do perfil rítmico e do segmento ST, podendo incluir variabilidade da frequência cardíaca | 43,70 € | GDH:40405 |
| Monitorização da pressão arterial durante 24 horas, incluindo gravação e análise por *scanning* | 59,20 € | GDH: 41010 |
| Monitorização eletrocardiográfica contínua, com registo de eventos, ativado pelo doente com memorização pré e pós-sintomática, por cada período de 7 dias | 47,30 € | GDH: 40479 |
| Prova de esforço em bicicleta ergométrica ou em tapete rolante com monitorização electrocardiográfica contínua, registo de ECG em cada estádio | 32,10 € | GDH: 40315 |
| Ecocardiograma transtorácico bidimensional | 38,80 € | GDH:40560 |
| Ecocardiograma com estudo Döppler | 53,20 € | GDH:40550 |
| Ecocardiografia transtorácica de sobrecarga com exercício, sem recurso a fármacos | 211,20 € | GDH: 40661 |
| Ecocardiografia transtorácica de sobrecarga farmacológica (inclui custo do fármaco) | 109,50 € | GDH: 40660 |
| Ecocardiografia transesofágica | 277,80 € | GDH:40630 |
| Cintigrafia miocárdica de perfusão em esforço/stress farmacológico | 212,20 € | GDH: 58015 |
| Doppler transcraniano | 37,60 € | GDH: 63770 |
| Doppler dos vasos do pescoço | 23,17 € | GDH:17290 |
| Doppler do sector arterial dos membros inferiores, cada membro | 23,17 € | GDH: 17294 |
| Angiografia cerebral | 535,60 € | GDH 14024 + GDH 14032 |
| Angio TC vasos pescoço supraaórticos | 177,60 € | GDH 16030 + GDH 16350 |
| Angiotomografia axial computorizada (AngioTC) | 264,40 € | GDH 16103 + GDH 16350 |
| Angiografia por ressonância magnética (AngioRM) | 533,50 € | GDH 18054 + GDH 18234 |
| Angiografia convencional dos membros inferiores | 535,60 € | GDH 14024 + GDH 14032 |
| RM cardíaca para estudo de perfusão do miocárdio | 195,70 € | GDH: 18113 |
| RM cardíaca morfológica/funcional | 127,90 € | GDH:18111/GDH:18112 |
| RM do crânio | 127,90 € | GDH: 18010 |
| TC do crânio | 67,00 € | GDH:16010 |
| TC, coronariografia (Angio-TC) | 210,70 € | GDH: 16063 |
| TC cardíaca, score de cálcio | 88,70 € | GDH: 16062 |
| Tórax, duas incidências (Tabela de Radiologia) | 9,00 € | GDH:10406 |
| Monitorização electrocardiográfica contínua até 7 dias, com registo de eventos, activado pelo doente com memorização pré e pós-sintomática | 47,30 € | GDH:40479 |

## **Tabela Suplementar S5: Custos unitários de reabilitação e ajudas técnicas.**

| **Recurso** | **Custo Unitário (€)** | **Descrição e Fontes** |
| --- | --- | --- |
| Técnicas especiais de cinesiterapia | 7,20 € | GDH 60377, Portaria n.º 254/2018 |
| Fortalecimento muscular manual | 4,80 € | GDH 61102, Portaria n.º 254/2018 |
| Treino de equilíbrio e marcha | 6,10 € | GDH 60404, Portaria n.º 254/2018 |
| Treino de destreza manual | 8,30 € | GDH 61068, Portaria n.º 254/2018 |
| Treino de coordenação motora | 6,10 € | GDH 61070, Portaria n.º 254/2018 |
| Treino de escrita à mão ou à máquina de escrever/computador | 5,20 € | GDH 61076, Portaria n.º 254/2018 |
| Treino em atividades de vida diária | 21,60 € | GDH 61087, Portaria n.º 254/2018 |
| Massagem com técnicas especiais | 8,50 € | GDH 60267, Portaria n.º 254/2018 |
| Terapia da fala | 7,80 € | GDH 61061, Portaria n.º 254/2018 |
| Treino de utilização de ortótese | 4,10 € | GDH 61024, Portaria n.º 254/2018 |
| Treino de utilização de prótese do membro inferior | 9,20 € | GDH 61002, Portaria n.º 254/2018 |
| Reabilitação cardíaca (grupo 6) | 18,90 € | GDH 61140, Portaria n.º 254/2018 |
| Mobilização articular manual | 4,90 € | GDH 60290, Portaria n.º 254/2018 |
| Serviços de Medicina Física e de Reabilitação | 205,10 € | Portaria n.º 207/2017 |
| Visitas de enfermagem | 33,10 € | Artigo 17º, Portaria nº 207/2017 |
| Visitas de Assistente Social | 11,47 € | Portaria nº. 183/2011 |
| Andarilho | 36,00 € | https://www.universosenior.com/products/andarilho-fixo-em-aluminio/ |
| Pirâmide Marcha | 22,00 € | https://www.universosenior.com/products/piramide-tripe-punho-curto/ |
| Cadeira/Veículo Rodas Sem Motor | 155,80 € | Ortopedia moderna |
| Talas posteriores pé equino | 80,00 € | Ortopedia moderna |
| Calçado | 69,00 € | https://www.universosenior.com/calcado/ |
| Tabuleiro para a cadeira de rodas | 85,00 € | https://www.universosenior.com/products/tabuleiro-em-madeira-para-cadeira-de-rodas/ |
| Tábua de transferência | 62,00 € | https://www.universosenior.com/mobilidade/tabuas-de-transferencia/ |
| Cinto de segurança | 15,00 € | https://www.universosenior.com/products/cinto-de-seguranca/ |
| Tala Posicionamento Mão/Postural Mão | 72,28 € | https://www.universosenior.com/products/tala-imobilizacao-de-mao-em-termoplastico/ |
| Cama Articulada | 322,00 € | https://www.universosenior.com/camas-hospitalares/ |
| Almofada anti-escara | 120,00 € | https://www.universosenior.com/prevencao-anti-escaras/almofadas-anti-escaras/ |
| Colchão anti-escaras | 170,00 € | https://www.universosenior.com/products/colchao-monobloco-com-resguardo-integral-em-espuma-hr-de-alta-densidade-polyplot/ |
| Canadiana | 12,50 € | https://www.universosenior.com/products/canadiana-access-comfort/ |
| Execução de ortóteses/ajudas técnicas. | 101,90 € | Portaria n.º 353/2017, de 16 de novembro |
| Palmilha com preenchimento | 97,55 € | Ortopedia moderna |
| Prótese | 2.500,00 € | Peritos |
| Copo | 500,00 € | Peritos |

## **Tabela Suplementar S6: Custos unitários de cuidados domiciliários e institucionalização.**

| **Cuidados Domiciliário e Institucionalização** | **Custo/dia (€)** | **Descrição e Fontes** |
| --- | --- | --- |
| Cuidados domiciliários | 9,64 € | Portaria n.º 353/2017 |
| Unidade de convalescença (30 dias) | 91,00 € | Encargos com cuidados de saúde  Foram excluídos os encargos com medicamentos, realização de exames auxiliares de diagnóstico, apósitos e material de penso para tratamento de úlceras de pressão pois já estão contabilizados no custo da medicação e MCDT.  Portaria n.º 353/2017 |
| Unidade de média duração e reabilitação (90 dias) | 56,08 € | Encargos com cuidados de saúde  Foram excluídos os encargos com medicamentos, realização de exames auxiliares de diagnóstico, apósitos e material de penso para tratamento de úlceras de pressão pois já estão contabilizados no custo da medicação e MCDT.  Portaria n.º 353/2017 |
| Unidade de longa duração e manutenção (>90 dias) | 19,97 € | Encargos com cuidados de saúde:18,61€/dia e com utilização de fraldas: 1,24€/dia  Foram excluídos os encargos com medicamentos, realização de exames auxiliares de diagnóstico, apósitos e material de penso para tratamento de úlceras de pressão pois já estão contabilizados no custo da medicação e MCDT.  Portaria n.º 353/2017 |
| Lar | 25,67 € | Custo do lar das instituições públicas: Inquérito DECO proteste 2013 (https://www.deco.proteste.pt/-/media/edideco/images/paper%20publications/teste%20saude/2013/102/lares%20de%20idosos/reference/lares%20de%20idosos/sp102_010014%20pdf.pdf?la=pt-pt) |

## **Tabela Suplementar S7: Custos unitários de deslocações.**

| **Tipo de transporte** | **Custo Unitário (€)** | **Fonte** |
| --- | --- | --- |
| Transporte (não urgente) | 12,02 | Dados auto-reportados de Despesas de transporte, da última vez que foi a uma urgência num hospital público. Barros, P.P. Políticas Públicas em Saúde: 2011–2014, Avaliação do Impacto [*Health Public Policies: 2011–2014. Impact Assessement*]. NOVA *Healthcare Initiative Research*/Universidade NOVA de Lisboa, Lisboa; 2015. |
| Transporte urgente de doentes | 35,05 | Contabilidade analítica do INEM ano 2012 |

## **Tabela Suplementar S8: Outros custos unitários.**

| **Ajudas Técnicas** | **Custo Unitário (€)** | **Descrição e Fontes** |
| --- | --- | --- |
| Fraldas | 0,36 | Cátalogo de Aprovisionamento Público da Saúde, SPMS, EPE; Fralda descartável para adulto (Tamanho médio), Fornecedor: INDAS PORTUGAL |

## **Tabela Suplementar S9: Taxa de emprego e custo diário médio associados à perda de produtividade por absenteísmo nos doentes com aterosclerose.**

|  | **Homens** | **Mulheres** |
| --- | --- | --- |
| **Taxa de emprego (<65 anos)** |  |  |
| EAM | 39,2% | 15,9% |
| Doença coronária crónica | 53,8% | 35,3% |
| IC isquémica | 63,1% | 51,0% |
| AVC | 40,5% | 33,9% |
| DAP | 76,0% | 69,9% |
| **Custo diário médio por trabalhador (<65 anos)** |  |  |
| Absenteísmo por consultas, MCDT e urgências* | € 95,39 | € 76,17 |
| Absenteísmo por internamento/convalescença | € 60,06 | € 47,96 |

*Estima-se que 50% das urgências ocorrem em período laboral.

Fonte: estimativa dos autores com base no INS 2014 e no Boletim Estatístico de novembro de 2018, Gabinete de Estratégia e Planeamento do Ministério do Trabalho, Solidariedade e da Segurança Social.

1. Ohman EM, Bhatt DL, Steg PG, Goto S, Hirsch AT, Liau CS, et al. The REduction of Atherothrombosis for Continued Health (REACH) Registry: An international, prospective, observational investigation in subjects at risk for atherothrombotic events-study design. Am Heart J. 2006;151(4):786.e1-786.e10. [↑](#footnote-ref-2)
